# Supplementary material
Source: ML conference proceedings conference paper supplement (https://proceedings.mlr.press/v103/benavoli19a.html)
Supplement: Supplementary file [file benavoli19a-supp.pdf]

## Appendix A. Technicalities

### A.1. Proofs of Section 2

PROOF OF THEOREM 1. The equivalence  $\text{clposi}(\mathcal{G}) = \text{Cn}_{\mathfrak{T}}(\mathcal{G})$  holds since in the derivation tree of a sequent  $\mathcal{G} \triangleright g$ , applications of the closure rule can be lifted up to the root and joint in a single inference step. The other equivalence traces back to Walley (1991).  $\square$

### A.2. Proofs of Section 4

PROOF OF PROPOSITION 4. As for  $\mathfrak{T}$ , the equivalence  $\text{clposi}(\mathcal{G}) = \text{Cn}_{\mathfrak{T}^*}(\mathcal{G})$  holds since in the derivation tree of a sequent  $\mathcal{G} \triangleright g$ , applications of the closure rule can be lifted up to the root and joint in a single inference step.

Next, for the equivalence between items (1)-(3), first of all, notice that  $\text{posi}(\mathcal{G} \cup \Sigma^{\geq}) \subseteq \text{clposi}(\mathcal{G} \cup \Sigma^{\geq}) \subseteq \text{Cn}_{\mathfrak{T}^*}(\mathcal{G})$ . Hence, (3) implies (2) implies (1). For the remaining implications we reason as follows. Assume that (2) holds, and assume  $f + \delta \in \text{posi}(\mathcal{G} \cup \Sigma^{\geq})$ , for every  $\delta > 0$ . This means  $f \in \text{cl}(\text{posi}(\mathcal{G} \cup \Sigma^{\geq}))$ . Suppose  $f \in \Sigma^{<}$ , then since  $\Sigma^{<}$  is open,  $f + \delta \in \Sigma^{<}$  for some  $\delta > 0$ , contradicting P-coherence of  $\text{posi}(\mathcal{G} \cup \Sigma^{\geq})$ . We therefore conclude that  $f \notin \Sigma^{<}$ , and that (3) holds. Now, assume (2) does not hold, i.e.  $f \in \Sigma^{<}$  and  $f \in \text{posi}(\mathcal{G} \cup \Sigma^{\geq})$ . Hence,  $-f$  is in the interior of  $\Sigma^{\geq}$ , meaning that for some  $\delta > 0$ ,  $-f - \delta = g \in \Sigma^{\geq}$ . From this we get that  $-1 = \frac{g+f}{\delta} \in \text{posi}(\mathcal{G} \cup \Sigma^{\geq})$ : (1) does not hold.  $\square$

PROOF OF PROPOSITION 5. Since (1) always implies (2), we need to verify the other direction. Assume  $\text{Cn}_{\mathfrak{T}^*}(\mathcal{G})$  is not P-coherent. By Proposition 4,  $-1 \in \text{Cn}_{\mathfrak{T}^*}(\mathcal{G})$ , and thus  $-\varepsilon \in \text{Cn}_{\mathfrak{T}^*}(\mathcal{G})$ , for every  $\varepsilon \geq 0$ . Let  $f \in \mathcal{L}_R$ . If (\*) holds there is  $\varepsilon > 0$  such that  $f + \varepsilon \in \Sigma^{\geq} \subseteq \text{Cn}_{\mathfrak{T}^*}(\mathcal{G})$ . Hence, by closure under linear combinations,  $f + \varepsilon + (-\varepsilon) = f \in \text{Cn}_{\mathfrak{T}^*}(\mathcal{G})$ .

Assume (b) holds. It is enough to prove that  $-B \subseteq \text{posi}(B \cup \{-1\})$ . Fix  $b \in B$ . By hypothesis  $-\frac{1}{\varepsilon}b - \sum_{i=1}^{\ell} \lambda_i b_i = -1$ , with  $\lambda_i \geq 0$  and  $\varepsilon > 0$ , for some  $\{b_1, \dots, b_{\ell}\} \subseteq B$ . Hence  $-b = \varepsilon(-1 + \sum_{i=1}^{\ell} \lambda_i b_i) \in \text{posi}(B \cup \{-1\})$ . We thus conclude that  $\text{Cn}_{\mathfrak{T}^*}(\mathcal{G})$  is logical inconsistent.  $\square$

In the next Proposition we explicit another property of  $\Sigma^{\geq}$  and verify that implies (\*).

**Proposition 1** *Assume that  $\Sigma^{\geq}$  contains a basis  $B$  of  $\mathcal{L}_R$  and for every  $b \in B$  there is a finite  $\{b_1, \dots, b_{\ell}\} \subset B$  such that  $b + \sum_{i=1}^{\ell} \lambda_i b_i = \varepsilon > 0$ , with  $\lambda_i \geq 0$ . Then condition (\*) holds*

**Proof** It is enough to check that, for  $b \in B$ , there is  $\varepsilon > 0$  such that  $-b + \varepsilon \in \Sigma^{\geq}$ . But this is immediate since by hypothesis we know there is a finite  $\{b_1, \dots, b_{\ell}\} \subset B$  such that  $b + \sum_{i=1}^{\ell} \lambda_i b_i = \varepsilon > 0$ , with  $\lambda_i \geq 0$ . Hence  $-b + \varepsilon =$

$\sum_{i=1}^{\ell} \lambda_i b_i$ , which is in  $\Sigma^{\geq}$  since the latter is a cone that includes  $B$ .  $\blacksquare$

PROOF OF PROPOSITION 8. This follows by Proposition 1 and the fact that Bernstein's polynomials form a partition of unity.  $\square$

PROOF OF PROPOSITION 9. Assume that a polynomial  $f(\theta)$  belongs to (15). If there exists a monomial of  $f(\theta)$  of degree  $\ell$  less than  $d$ , then we can multiply it for the Bernstein partition of unity of degree  $d - \ell$ . The resulting polynomial will then belong to (17). The opposite direction of the proof is obvious.  $\square$

## References

Peter Walley. *Statistical Reasoning with Imprecise Probabilities*. Chapman & Hall/CRC Monographs on Statistics & Applied Probability. Taylor & Francis, 1991. ISBN 9780412286605.
